# Supplementary material for: The simplest alkynyl thiocyanate HCCSCN and its isomers
Source: Royal Society of Chemistry journal article supplement (doi:10.1039/d1cc00629k), 2021-01-01
Supplement: d1cc00629k1.pdf [file d1cc00629k1.pdf]

## Supporting Information

### The simplest alkynyl thiocyanate HCCSCN and its isomers

Bo Lu,<sup>a</sup> Zhuang Wu,<sup>a</sup> Lina Wang,<sup>a</sup> Bifeng Zhu,<sup>a</sup> Guntram Rauhut,<sup>b</sup> and Xiaoqing Zeng\*<sup>a</sup>

<sup>a</sup>Department of Chemistry, Fudan University, Shanghai 200433 (China)

E-mail: xqzeng@fudan.edu.cn

<sup>b</sup>Institute for Theoretical Chemistry, University of Stuttgart Pfaffenwaldring 55, Stuttgart 70569 (Germany)

## Table of Contents

|                                                                                  |     |
|----------------------------------------------------------------------------------|-----|
| Experimental and computational details.....                                      | S3  |
| Temperature-pressure curve of HC≡CSCN (Figure S1).....                           | S5  |
| UV-Vis IR spectra of HC≡CSCN (Figure S2).....                                    | S5  |
| IR difference spectra for the photochemistry of HCCC(O)NCS (Figure S3).....      | S6  |
| Calculated potential energy profile of HCCSCN (Figure S4).....                   | S7  |
| Calculated and observed NMR data (Table S1).....                                 | S8  |
| Calculated and observed IR frequencies of HC≡CSCN (Table S2).....                | S9  |
| Calculated and observed IR frequencies of HC≡CSNC (Table S3).....                | S10 |
| Calculated and observed IR frequencies of NCC(H)CS (Table S4).....               | S11 |
| Calculated IR frequencies of HC≡CCNS (Table S5).....                             | S12 |
| Calculated vertical transitions of HC≡CSCN and different isomers (Table S6)..... | S13 |
| References.....                                                                  | S14 |
| Calculated atomic coordinates and energies for all optimized structures.....     | S16 |

## Experimental and computational details

### Sample preparation

Alkynyl thiocyanate HCCSCN was prepared according to the reference for the synthesis of PhCCSCN<sup>1</sup> with modifications. Briefly, sodium thiocyanate (0.162 g, 2.0 mmol) was added to the alkynyl iodonium triflate (0.567 g, 1.5 mmol) in 2.0 mL dichloromethane. The mixture was stirred at 25°C for 4 h. Then, all the volatiles were separated by low-temperature fractional condensation using three successive cold U-traps at -60°C, -80 °C, and -196 °C under dynamic vacuum conditions (10 Pa). The desired product HCCSCN (60 mg, 0.7 mmol) was retained in the first trap as white solid. The purity of the substance was checked by NMR spectroscopy (Bruker AVANCE NEO 400 MHz spectrometer). UV/Vis spectra of gaseous HCCSCN were recorded in a closed quartz cell at 300 K with a Shimadzu UV 3600 spectrometer.

Propiolyl isocyanate HCCC(O)NCS was synthesized by treatment of the corresponding propiolyl chloride with sodium thiocyanate. Briefly, propiolyl chloride (0.16 mL, 2.0 mmol) was added dropwise to a solution of sodium thiocyanate (0.203 g, 2.5 mmol) in 0.5 mL propylene carbonate. The mixture was stirred at 25 °C for 4 h. Then, all the volatiles were separated by fractional condensation using three successive cold U-traps at -40, -65, and -196 °C under dynamic vacuum conditions (10 Pa). The desired product HCCC(O)NCS (0.167 g, 1.5 mmol) was retained in the middle trap as white solid. The purity of the substance was checked by gas phase IR ( $\nu = 3328/3320, 2128, 2029, 1970/1967, 1735/1725, 1201/1166, 975/937, 724/720, 689, 656, \text{ and } 592 \text{ cm}^{-1}$ ) and NMR spectroscopy.

### Matrix-isolation IR Spectroscopy

Matrix IR spectra were recorded on a FT-IR spectrometer (Bruker 70 V) in a reflectance mode using a transfer optic. A KBr beam splitter and liquid nitrogen cooled mercury cadmium telluride (MCT) detector were used in the mid-IR

region (4000–450  $\text{cm}^{-1}$ ). For each spectrum, 200 scans at a resolution of 0.5  $\text{cm}^{-1}$  were co-added. The gaseous sample was mixed by passing a flow of Ar gas through a U-trap ( $-54^\circ\text{C}$ ) containing ca. 20 mg of the HCCSCN. Then the mixture (alkynyl thiocyanate/dilution gas  $\approx$  1:1000 estimated) were deposited (2 mmol  $\text{h}^{-1}$ ) onto the Rh-plated copper block matrix support (Ar: 10 K) in a high vacuum ( $\sim 10^{-6}$  Pa). For Propiolyl isocyanate, the sample was evaporated from a U-trap ( $-57^\circ\text{C}$ ) onto the Rh-plated copper block matrix support (Ar: 10 K). Photolysis was performed by using an ArF excimer laser (Gamlaser EX5/250, 3 Hz, 193 nm) and a  $\text{Nd}^{3+}$ :YAG laser (MPL-F-266, 266 nm, 10 mW).

### Quantum chemical calculation methods

Structures and IR frequencies were calculated using the B3LYP/6-311++G(3df,3pd)<sup>2</sup> and CBS-QB3<sup>3</sup> methods and the ab initio CCSD(T)<sup>4</sup> method at the cc-pVTZ<sup>5</sup> basis set. Anharmonic IR frequencies obtained from configuration-selective vibrational configuration interaction (VCI) theory<sup>6</sup> and second-order vibration perturbation (VPT2) theory<sup>7</sup> were calculated at the CCSD(T)-F12a/cc-pVTZ-F12 and CCSD(T)/cc-pVTZ levels,<sup>8</sup> respectively. Time-dependent (TD) DFT (B3LYP/6-311++G(3df,3pd)) calculations<sup>9</sup> were performed for the prediction of UV-Vis transitions. NMR chemical shift values were calculated using the gauge-independent atomic orbital (GIAO)<sup>10</sup> method and the SMD solvent model at the B3LYP/6-311++G(3df,3pd) level. Local minima were confirmed by vibrational analysis and the transition states were further confirmed by intrinsic reaction coordinate (IRC) calculations.<sup>11</sup> All the DFT calculations were performed using the Gaussian 09 software package.<sup>12</sup> The CCSD(T) and CCSD(T)-F12a calculations were performed with the CFOUR<sup>13</sup> and MOLPRO<sup>14</sup> programs, respectively.

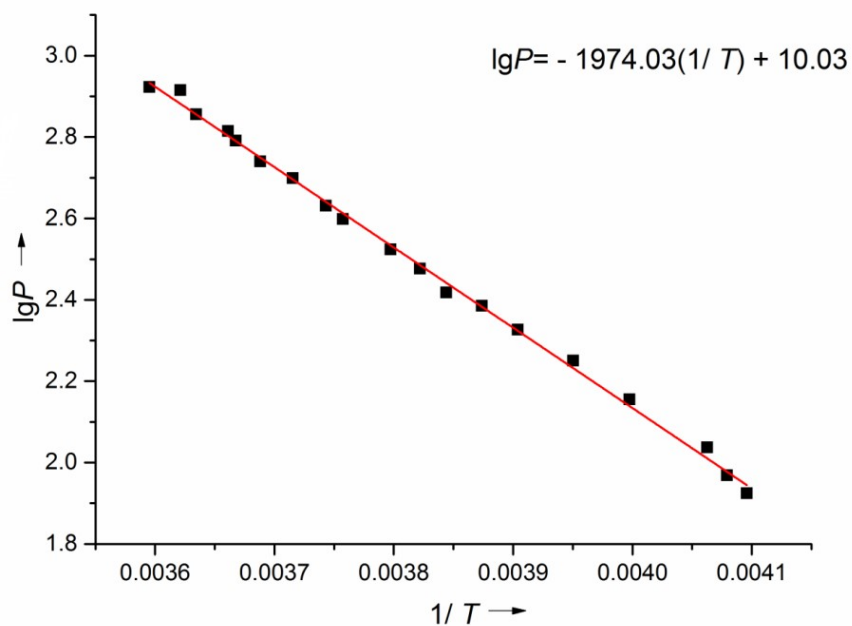

**Fig. S1** Temperature-pressure curve for HC≡CSCN in the temperature range from -29 to 10 °C.

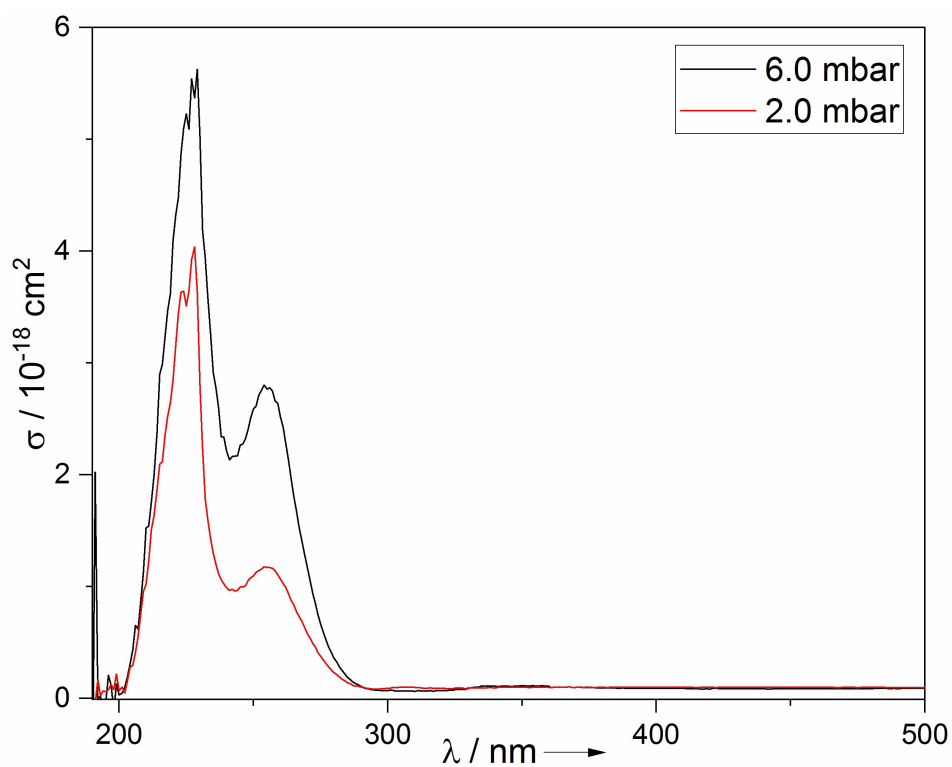

**Fig. S2** UV/Vis IR spectra of gaseous HC≡CSCN at 300 K. The two absorptions ( $\lambda_{\max}$ ) at 255 and 230 nm correspond to the computed vertical transitions at 264/249 and 210 nm at the TD-B3LYP/6-311++G(3df,3pd) level of theory (Table S6).

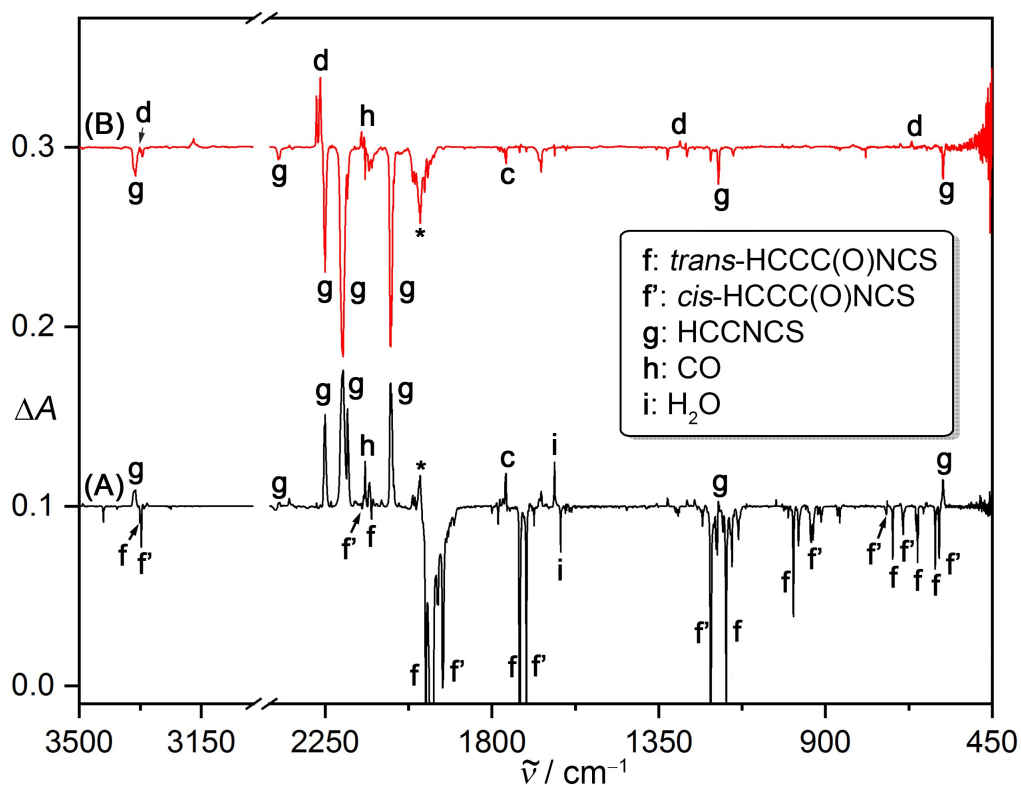

**Fig. S3** A) IR difference spectrum reflecting the change of Ar-matrix isolated HCCC(O)NCS (*trans*: f; *cis*: f') upon a 266 nm laser photolysis (180 min). B) IR difference spectrum reflecting the change of Ar-matrix upon subsequent 193 nm laser photolysis (7 min). The IR band at 1994.1 cm<sup>-1</sup> for an unknown species is labeled with an asterisk, and it is different from the IR band for HCCCO• radical (2308.6 cm<sup>-1</sup>, Ar-matrix).<sup>15</sup>

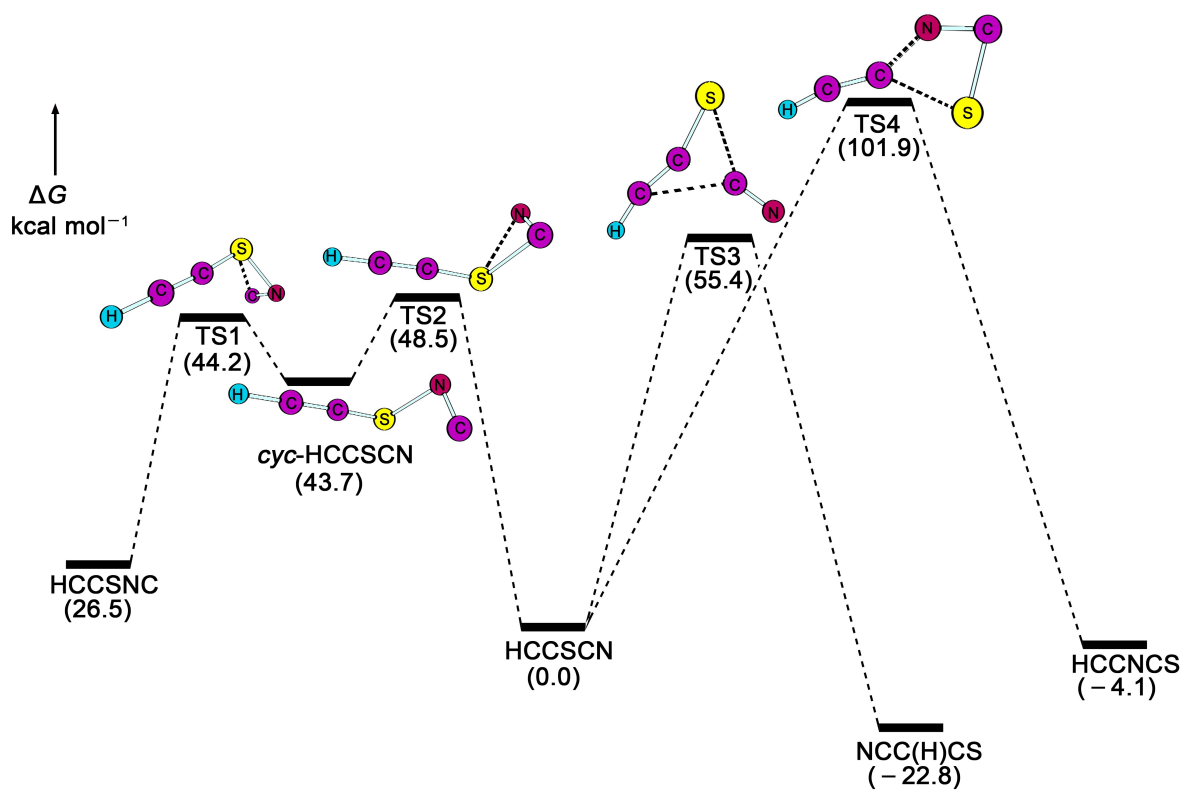

**Fig. S4** Calculated potential energy profile (Gibbs free energy,  $\Delta G$ ) for the isomerization of HCCSCN at the CCSD(T)-F12a/aug-cc-pVTZ//B3LYP/6-311++G(3df,3pd) level of theory (with zero-point vibrational energy corrections).

**Table S1.** Calculated<sup>a</sup> and observed<sup>b</sup> NMR spectroscopic data of acetylene, azidoacetylene, alkynyl isocyanate, and alkynyl thiocyanate.

| Compound           | Signal<br>(solvent)                                | $\delta_{\text{calc}}$ | $\delta_{\text{obs}}^c$ | $\Delta_{\text{ref}}^d$ | $\delta_{\text{calc}} + \Delta_{\text{ref}}$ | Coupling constants $J_{\text{CH}}$ (Hz) |                   |
|--------------------|----------------------------------------------------|------------------------|-------------------------|-------------------------|----------------------------------------------|-----------------------------------------|-------------------|
|                    |                                                    |                        |                         |                         |                                              | obs                                     | calc <sup>g</sup> |
| HC≡CH              | <sup>1</sup> H (CD <sub>2</sub> Cl <sub>2</sub> )  | -29.8                  | 2.0                     | 31.8                    | 2.0                                          | 49.4 <sup>f</sup>                       | 48.5              |
| HC≡CH              | <sup>13</sup> C (CD <sub>2</sub> Cl <sub>2</sub> ) | -109.8                 | 72.0                    | 181.8                   | 72                                           | 249.6 <sup>f</sup>                      | 247.2             |
| HC≡CN <sub>3</sub> | <sup>1</sup> H (CD <sub>2</sub> Cl <sub>2</sub> )  | -29.1                  | 2.55                    | 31.8                    | 2.7                                          |                                         |                   |
| HC≡CN <sub>3</sub> | <sup>13</sup> C (CD <sub>2</sub> Cl <sub>2</sub> ) | -109.6                 | 71.9                    | 181.8                   | 72.2                                         | 57.5 <sup>f</sup>                       | 56.6              |
| HC≡CN <sub>3</sub> | <sup>13</sup> C (CD <sub>2</sub> Cl <sub>2</sub> ) | -128.2                 | 54.5                    | 181.8                   | 53.6                                         | 262.8 <sup>f</sup>                      | 261.5             |
| HC≡CNCO            | <sup>1</sup> H (CD <sub>2</sub> Cl <sub>2</sub> )  | -29.9                  | 3.78                    | 31.8                    | 1.9                                          |                                         |                   |
| HC≡CNCO            | <sup>13</sup> C (CD <sub>2</sub> Cl <sub>2</sub> ) | -70.8                  | 124.79 <sup>e</sup>     | 181.8                   | 111.0                                        |                                         |                   |
| HC≡CNCO            | <sup>13</sup> C (CD <sub>2</sub> Cl <sub>2</sub> ) | -116.1                 | 65.48 <sup>e</sup>      | 181.8                   | 65.7                                         | 59 <sup>f</sup>                         | 58.2              |
| HC≡CNCO            | <sup>13</sup> C (CD <sub>2</sub> Cl <sub>2</sub> ) | -141.3                 | 44.46 <sup>e</sup>      | 181.8                   | 40.5                                         | 267 <sup>f</sup>                        | 282.8             |
| HC≡CSCN            | <sup>1</sup> H (CDCl <sub>3</sub> )                | -28.1                  | 3.3                     | 31.8                    | 3.7                                          |                                         |                   |
| HC≡CSCN            | <sup>13</sup> C (CDCl <sub>3</sub> )               | -65.8                  | 106.2                   | 181.8                   | 116.0                                        |                                         |                   |
| HC≡CSCN            | <sup>13</sup> C (CDCl <sub>3</sub> )               | -119.9                 | 59.3                    | 181.8                   | 61.9                                         | 53                                      | 61.1              |
| HC≡CSCN            | <sup>13</sup> C (CDCl <sub>3</sub> )               | -84.3                  | 89.5                    | 181.8                   | 97.5                                         | 262                                     | 265.0             |

<sup>a</sup>All geometries and NMR chemical shifts were calculated at the B3LYP/6-311++G(3df,3pd) level of theory. <sup>b</sup><sup>1</sup>H (600 MHz) and <sup>13</sup>C (150 MHz) NMR spectra were recorded at 25 °C. <sup>c</sup>The observed NMR chemical shifts of HC≡CH and HC≡CN<sub>3</sub> are from reference.<sup>16</sup> <sup>d</sup>The reference quantity  $\Delta_{\text{ref}}$  was determined by using  $\delta_{\text{calc}}$  and  $\delta_{\text{obs}}$  of acetylene in the case of <sup>1</sup>H NMR and <sup>13</sup>C NMR data. <sup>e</sup>The observed NMR chemical shifts of HC≡CNCO are from reference.<sup>17</sup> <sup>f</sup>The observed data are taken from reference.<sup>16,17</sup> <sup>g</sup>Calculated coupling constants at the B3LYP/6-311++G(3df,3pd) level of theory.



**Table S2.** Observed and calculated vibrational data ( $> 450 \text{ cm}^{-1}$ ) for HCCSCN.

| CCSD(T)-F12a <sup>a</sup> | CCSD(T) <sup>b</sup> | Ar-matrix <sup>c</sup> | Gas-phase <sup>d</sup> | Assign <sup>e</sup>                           |
|---------------------------|----------------------|------------------------|------------------------|-----------------------------------------------|
| 3318 (94)                 | 3326 (72)            | 3324.4 (100)           | 3325 (vs)              | $\nu_1$ , $\nu(\text{C-H})$                   |
| 2186 (20)                 | 2179 (1)             | 2181.2 (5)             | 2183 (w)               | $\nu_2$ , $\nu(\text{C}\equiv\text{N})$       |
| 2078 (1)                  | 2076 ( $< 1$ )       | 2080.8 (1)             | 2072 (vw)              | $\nu_3$ , $\nu(\text{C}\equiv\text{C})$       |
| 1401 (9)                  | 1376 (9)             | 1390.7 (6)             | 1389 (ms)              | $2 \nu_5$                                     |
| 1190 (18)                 | 1179 (14)            | 1170.8 (7)             | 1165 (s)               | $2 \nu_7$                                     |
| 714 (12)                  | 703 (6)              | 712.7 (7)              | 712 (sh)               | $\nu_4$ , $\delta_{\text{i.p.}}(\text{CH})$   |
| 705 (38)                  | 689 (35)             | 697.3 (32)             | 698(vs)                | $\nu_5$ , $\nu(\text{CC-S})$                  |
| 677 (5)                   | 632 (709)            | 672.8 (2)              | n.o. <sup>f</sup>      | $\nu_6$ , $\nu(\text{S-CN})$                  |
| 583 (62)                  | 585 (47)             | 586.5 (45)             | 585 (vs)               | $\nu_7$ , $\delta_{\text{o.o.p.}}(\text{CH})$ |
| 478 (9)                   | 477 (7)              | 484.7 (9)              | 481 (ms)               | $\nu_8$ , $\delta_{\text{i.p.}}(\text{CSC})$  |

<sup>a</sup>Calculated anharmonic IR frequencies and intensities in parentheses ( $\text{km mol}^{-1}$ ) at the CCSD(T)-F12a/cc-pVTZ-F12 level using configuration-selective vibrational configuration interaction (VCI) theory. <sup>b</sup>Calculated anharmonic IR frequencies and intensities in parentheses ( $\text{km mol}^{-1}$ ) at the CCSD(T)/cc-pVTZ level using second-order vibration perturbation (VPT2) theory. <sup>c</sup>Observed band positions and relative integrated intensities (in parentheses) in Ar-matrix at 10 K. <sup>d</sup>Observed band positions and relative intensities (vs: very strong, s: strong, ms: medium strong, w: weak, sh: shoulder) in the gas phase at 300 K. <sup>e</sup>Tentative assignment of the modes based on the calculated vibrational displacement vectors. <sup>f</sup>The abbreviation “n.o.” denotes “not observed”.

**Table S3.** Observed and calculated vibrational data ( $> 450 \text{ cm}^{-1}$ ) for HCCSNC.

| CCSD(T)-F12a <sup>a</sup> | CCSD(T) <sup>b</sup> | Ar-matrix <sup>c</sup> | Assign <sup>d</sup>                           |
|---------------------------|----------------------|------------------------|-----------------------------------------------|
| 3321 (80)                 | 3325 (103)           | 3308.6 (76)            | $\nu_1$ , $\nu(\text{C-H})$                   |
| 2066 (39)                 | 2064 (2)             | 2062.8 (36)            | $\nu_2$ , $\nu(\text{C}\equiv\text{C})$       |
| 2049 (312)                | 2044 (168)           | 2044.9 (100)           | $\nu_3$ , $\nu(\text{N}\equiv\text{C})$       |
| 721 (13)                  | 711 (1955)           | 755.0 (5)              | $\nu_4$ , $\delta_{\text{i.p.}}(\text{CH})$   |
| 709 (49)                  | 707 (2069)           | 712.0 (57)             | $\nu_5$ , $\nu(\text{C-S})$                   |
| 685 (27)                  | 651 (38)             | 623.0 (54)             | $\nu_6$ , $\nu(\text{S-N})$                   |
| 561 (70)                  | 562 (50)             | 557.3 (65)             | $\nu_7$ , $\delta_{\text{o.o.p.}}(\text{CH})$ |
| 446 (15)                  | 441 (10)             | n.o. <sup>e</sup>      | $\nu_8$ , $\delta_{\text{i.p.}}(\text{CSN})$  |

<sup>a</sup>Calculated anharmonic IR frequencies and intensities in parentheses ( $\text{km mol}^{-1}$ ) at the CCSD(T)-F12a/cc-pVTZ-F12 level using configuration-selective vibrational configuration interaction (VCI) theory. <sup>b</sup>Calculated anharmonic IR frequencies and intensities in parentheses ( $\text{km mol}^{-1}$ ) at the CCSD(T)/cc-pVTZ level using second-order vibration perturbation (VPT2) theory. <sup>c</sup>Observed band positions and relative integrated intensities (in parentheses) in Ar-matrix at 10 K. <sup>d</sup>Tentative assignment of the modes based on the calculated vibrational displacement vectors. <sup>e</sup>The abbreviation “n.o.” denotes “not observed”.

**Table S4.** Observed and calculated vibrational data ( $> 450 \text{ cm}^{-1}$ ) for NCC(H)CS.

| VPT2 <sup>a</sup> | CCSD(T) <sup>b</sup> | Ar-matrix <sup>c</sup> | Assign <sup>d</sup>                           |
|-------------------|----------------------|------------------------|-----------------------------------------------|
| 3084 (8)          | 3063 (26)            | 3062.3 (3)             | $\nu_1$ , $\nu(\text{C-H})$                   |
| 2230 (103)        | 2230 (20)            | 2230.0 (8)             | $\nu_2$ , $\nu(\text{C}\equiv\text{N})$       |
| 1761 (791)        | 1762 (319)           | 1760.7 (100)           | $\nu_3$ , $\nu(\text{C=C})$                   |
| 1259 (133)        | 1238 (147)           | 1256.2 (2)             | $\nu_4$ , $\delta_{\text{i.p.}}(\text{CH})$   |
| 1043 (35)         | 1026 (1)             | 1052.2 ( $< 1$ )       | $\nu_5$ , $\nu(\text{C-C})$                   |
| 851 (27)          | 844 (10)             | 854.6 (5)              | $\nu_6$ , $\nu(\text{C=S})$                   |
| 618 (42)          | 628 (31)             | 629.7 (1)              | $\nu_7$ , $\delta_{\text{o.o.p.}}(\text{CH})$ |
| 550 (494)         | 547 (3)              | n.o. <sup>e</sup>      | $\nu_8$ , $\delta_{\text{i.p.}}(\text{CCC})$  |

<sup>a</sup>Calculated anharmonic IR frequencies and intensities in parentheses ( $\text{km mol}^{-1}$ ) at the CCSD(T)-F12a/cc-pVTZ-F12 level using second-order vibration perturbation (VPT2) theory.

<sup>b</sup>Calculated anharmonic IR frequencies and intensities in parentheses ( $\text{km mol}^{-1}$ ) at the CCSD(T)/cc-pVTZ level using second-order vibration perturbation (VPT2) theory. <sup>c</sup>Observed band positions and relative integrated intensities (in parentheses) in Ar-matrix at 10 K.

<sup>d</sup>Tentative assignment of the modes based on the calculated vibrational displacement vectors. <sup>e</sup>The abbreviation "n.o." denotes "not observed".

**Table S5.** Calculated IR frequencies ( $> 450 \text{ cm}^{-1}$ ) of  $\text{HC}\equiv\text{CCNS}$ .

| CCSD(T)-F12a <sup>a</sup> | CCSD(T) <sup>b</sup> | B3LYP <sup>c</sup> | Assign <sup>d</sup>                          |
|---------------------------|----------------------|--------------------|----------------------------------------------|
| 3315                      | 3451                 | 3463               | $\nu_1$ , $\nu(\text{C-H})$                  |
| 2205                      | 2259                 | 2291               | $\nu_2$ , $\nu_{\text{asymm}}(\text{CCN})$   |
| 2042                      | 2077                 | 2124               | $\nu_3$ , $\nu_{\text{symm}}(\text{CCN})$    |
| 1071                      | 1102                 | 1115               | $\nu_4$ , $\nu_{\text{asymm}}(\text{CNS})$   |
| 594                       | 607                  | 642                | $\nu_5$ , $\delta_{\text{i.p.}}(\text{C-H})$ |
| 553                       | 566                  | 579                | $\nu_6$ , $\nu(\text{NS})$                   |

<sup>a</sup>Calculated VPT2 anharmonic IR frequencies at the CCSD(T)/cc-pVTZ level. <sup>b</sup>Calculated harmonic IR frequencies at the CCSD(T)/cc-pVTZ level. <sup>c</sup>Calculated anharmonic IR frequencies at the B3LYP/6-311++G(3df,3pd) level. <sup>d</sup>Tentative assignment based on the calculated vibrational displacement vectors.

**Table S6.** Calculated vertical transitions (> 170 nm) of HC≡CSCN and different isomers at the TD-B3LYP/6-311++G(3df,3pd) level.

| HCCSCN      |                                  | HCCSNC      |                                  | HCCNCS      |                                  | NCC(H)CS    |                                  | HCCCNCS     |                                  | HCCNSC      |                                  |
|-------------|----------------------------------|-------------|----------------------------------|-------------|----------------------------------|-------------|----------------------------------|-------------|----------------------------------|-------------|----------------------------------|
| energy (nm) | oscillator strength ( <i>f</i> ) | energy (nm) | oscillator strength ( <i>f</i> ) | energy (nm) | oscillator strength ( <i>f</i> ) | energy (nm) | oscillator strength ( <i>f</i> ) | energy (nm) | oscillator strength ( <i>f</i> ) | energy (nm) | oscillator strength ( <i>f</i> ) |
| 264         | 0.0003                           | 279         | 0.0005                           | 205         | 0.0453                           | 511         | 0.0001                           | 227         | 1.4124                           | 576         | 0.0323                           |
| 249         | 0.0008                           | 241         | 0.0012                           | 187         | 0.0003                           | 246         | 0.1591                           | 223         | 0.0165                           | 423         | 0.0064                           |
| 210         | 0.0251                           | 220         | 0.0027                           |             |                                  | 237         | 0.0001                           | 212         | 0.0074                           | 372         | 0.0010                           |
| 204         | 0.0006                           | 208         | 0.0007                           |             |                                  | 233         | 0.0128                           |             |                                  | 318         | 0.0002                           |
| 189         | 0.0163                           | 196         | 0.0450                           |             |                                  | 216         | 0.0022                           |             |                                  | 302         | 0.3433                           |
| 182         | 0.0381                           | 194         | 0.0004                           |             |                                  | 201         | 0.0711                           |             |                                  | 253         | 0.0003                           |
| 179         | 0.0121                           | 193         | 0.1910                           |             |                                  | 198         | 0.0061                           |             |                                  | 248         | 0.0357                           |
| 178         | 0.0001                           | 185         | 0.0098                           |             |                                  | 191         | 0.0007                           |             |                                  | 241         | 0.0076                           |
| 177         | 0.0006                           | 181         | 0.0980                           |             |                                  | 190         | 0.5786                           |             |                                  | 226         | 0.0010                           |
|             |                                  | 175         | 0.0054                           |             |                                  | 187         | 0.0005                           |             |                                  |             |                                  |

## References

1. (a) P. J. Stang, *J. Org. Chem.*, 2003, **68**, 2997–3008; (b) D. R. Fischer, B. L. Williamson and P. J. Stang, *Synlett*, 1992, **1992**, 535–536.
2. (a) A. D. Becke, *J. Chem. Phys.*, 1993, **98**, 5648–5652; (b) M. J. Frisch, J. A. Pople and J. S. Binkley, *J. Chem. Phys.*, 1984, **80**, 3265–3269.
3. J. A. Montgomery Jr., M. J. Frisch, J. W. Ochterski and G. A. Petersson, *J. Chem. Phys.*, 2000, **112**, 6532–6542.
4. K. Raghavachari, G. W. Trucks, J. A. Pople and M. Head-Gordon, *Chem. Phys. Lett.*, 1989, **157**, 479–483.
5. T. H. Dunning Jr., *J. Chem. Phys.*, 1989, **90**, 1007–1023.
6. M. Neff and G. Rauhut, *J. Chem. Phys.*, 2009, **131**, 124129.
7. V. Barone, *J. Chem. Phys.*, 2005, **122**, 014108.
8. (a) T. B. Adler, G. Knizia and H. Werner, *J. Chem. Phys.*, 2007, **127**, 221106; (b) K. A. Peterson, T. B. Adler and H. Werner, *J. Chem. Phys.*, 2008, **128**, 084102.
9. (a) R. E. Stratmann, G. E. Scuseria and M. J. Frisch, *J. Chem. Phys.*, 1998, **109**, 8218–8224; (b) J. B. Foresman, M. Head-Gordon, J. A. Pople and M. J. Frisch, *J. Phys. Chem.*, 1992, **96**, 135–149.
10. K. Wolinski, J. F. Hinton and P. Pulay, *J. Am. Chem. Soc.*, 1990, **112**, 8251–8260.
11. (a) K. Fukui, *Acc. Chem. Res.*, 1981, **14**, 363–368; (b) H. P. Hratchian and H. B. Schlegel, *J. Chem. Theory Comput.*, 2005, **1**, 61–69.
12. M. J. Frisch, G. W. Trucks, H. B. Schlegel, G. E. Scuseria, M. A. Robb, J. R. Cheeseman, G. Scalmani, V. Barone, B. Mennucci, G. A. Petersson, H. Nakatsuji, M. Caricato, X. Li, H. P. Hratchian, A. F. Izmaylov, J. Bloino, G. Zheng, J. L. Sonnenberg, M. Hada, M. Ehara, K. Toyota, R. Fukuda, J. Hasegawa, M. Ishida, T. Nakajima, Y. Honda, O. Kitao, H. Nakai, T. Vreven, J. A. Montgomery, Jr., J. E. Peralta, F. Ogliaro, M. Bearpark, J. J. Heyd, E. Brothers, K. N. Kudin, V. N. Staroverov, R. Kobayashi, J. Normand, K. Raghavachari, A. Rendell, J. C. Burant, S. S. Iyengar, J. Tomasi, M. Cossi, N. Rega, J. M. Millam, M. Klene, J. E. Knox, J. B. Cross, V. Bakken, C. Adamo, J. Jaramillo, R. Gomperts, R. E. Stratmann, O. Yazyev, A. J. Austin, R. Cammi, C. Pomelli, J. W. Ochterski, R. L. Martin, K. Morokuma, V. G. Zakrzewski, G. A. Voth, P. Salvador, J. J. Dannenberg, S. Dapprich, A. D. Daniels, Ö. Farkas, J. B. Foresman, J. V. Ortiz, J. Cioslowski and D. J. Fox, Gaussian, Inc., Wallingford CT, Gaussian 09, Revision A.02.
13. CFOUR, Coupled-Cluster techniques for Computational Chemistry, a quantum-chemical program package by J. F. Stanton, J. Gauss, M. E. Harding, P. G. Szalay with contributions from A. A. Auer, R. J. Bartlett, U. Benedikt, C. Berger, D. E. Bernholdt, Y. J. Bomble, L. Cheng, O. Christiansen, M. Heckert, O. Heun, C. Huber, T. -C. Jagau, D. Jonsson, J. Jusélius, K. Klein, W. J. Lauderdale, D. A. Matthews, T. Metzroth, L. A. Mück, D. P. O'Neill, D. R.

- Price, E. Prochnow, C. Puzzarini, K. Ruud, F. Schiffmann, W. Schwalbach, S. Stopkowicz, A. Tajti, J. Vázquez, F. Wang, J. D. Watts and the integral packages MOLECULE (J. Almlöf, P. R. Taylor), PROPS (P. R. Taylor), ABACUS (T. Helgaker, H. J. Aa. Jensen, P. Jørgensen, J. Olsen), and ECP routines by A. V. Mitin and C. van Wüllen. For the current version, see <http://www.cfour.de>.
14. (a) H.-J. Werner, P. J. Knowles, G. Knizia, F. R. Manby and M. Schütz, *WIREs Comput. Mol. Sci.*, 2012, **2**, 242–253; (b) A package of ab initio programs written by H.-J. Werner, P. J. Knowles, G. Knizia, F. R. Manby, M. Schütz, P. Celani, T. Korona, R. Lindh, A. Mitrushenkov, G. Rauhut, K. R. Shamasundar, T. B. Adler, R. D. Amos, A. Bernhardsson, A. Berning, D. L. Cooper, M. J. O. Deegan, A. J. Dobbyn, F. Eckert, E. Goll, C. Hampel, A. Hesselmann, G. Hetzer, T. Hrenar, G. Jansen, C. Köppl, Y. Liu, A. W. Lloyd, R. A. Mata, A. J. May, S. J. McNicholas, W. Meyer, M. E. Mura, A. Nicklaß, D. P. O’Neill, P. Palmieri, D. Peng, K. Pflüger, R. Pitzer, M. Reiher, T. Shiozaki, H. Stoll, A. J. Stone, R. Tarroni, T. Thorsteinsson and M. Wang, MOLPRO, version, 2012.1, <http://www.molpro.net>.
  15. Q. Jiang and W. R. M. Graham, *J. Chem. Phys.*, 1993, **98**, 9251–9255.
  16. K. Banert, R. Arnold, M. Hagedorn, P. Thoss and A. A. Auer, *Angew. Chem. Int. Ed.*, 2012, **51**, 7515–7518.
  17. Y. Y. Qin, B. Lu, G. Rauhut, M. Hagedorn, K. Banert, C. Song, X. X. Chu, L. N. Wang and X. Q. Zeng, *Angew. Chem. Int. Ed.*, 2019, **58**, 17277–17281.

**Calculated atomic coordinates and energies (Hartrees) for all optimized structures.**

**HC≡CSCN**

B3LYP/6-311++G(3df,3pd)

|   |             |             |            |
|---|-------------|-------------|------------|
| C | 2.25077900  | -0.90339900 | 0.00000000 |
| H | 3.10783000  | -1.53053300 | 0.00000000 |
| C | 1.27215600  | -0.20730800 | 0.00000000 |
| C | -1.34445600 | -0.13967300 | 0.00000000 |
| S | 0.00000000  | 0.90157600  | 0.00000000 |
| N | -2.31124300 | -0.77034300 | 0.00000000 |

|                                              |             |
|----------------------------------------------|-------------|
| Zero-point correction=                       | 0.028062    |
| Thermal correction to Energy=                | 0.033388    |
| Thermal correction to Enthalpy=              | 0.034333    |
| Thermal correction to Gibbs Free Energy=     | -0.000743   |
| Sum of electronic and zero-point Energies=   | -567.813248 |
| Sum of electronic and thermal Energies=      | -567.807921 |
| Sum of electronic and thermal Enthalpies=    | -567.806977 |
| Sum of electronic and thermal Free Energies= | -567.842052 |

**HC≡CSNC**

B3LYP/6-311++G(3df,3pd)

|   |             |             |            |
|---|-------------|-------------|------------|
| C | 2.20602700  | -0.98208100 | 0.00000000 |
| H | 3.05114700  | -1.62517700 | 0.00000000 |
| C | 1.24253400  | -0.26141800 | 0.00000000 |
| S | 0.00000000  | 0.86542300  | 0.00000000 |
| C | -2.38316300 | -0.66642200 | 0.00000000 |
| N | -1.34907600 | -0.10886800 | 0.00000000 |

|                                              |             |
|----------------------------------------------|-------------|
| Zero-point correction=                       | 0.027079    |
| Thermal correction to Energy=                | 0.032692    |
| Thermal correction to Enthalpy=              | 0.033636    |
| Thermal correction to Gibbs Free Energy=     | -0.001977   |
| Sum of electronic and zero-point Energies=   | -567.772980 |
| Sum of electronic and thermal Energies=      | -567.767368 |
| Sum of electronic and thermal Enthalpies=    | -567.766424 |
| Sum of electronic and thermal Free Energies= | -567.802036 |

**HC≡CNCS**

B3LYP/6-311++G(3df,3pd)

|   |            |            |            |
|---|------------|------------|------------|
| C | 0.00000000 | 0.00000000 | 3.08841800 |
|---|------------|------------|------------|



|   |            |            |             |
|---|------------|------------|-------------|
| H | 0.00000000 | 0.00000000 | 4.14878300  |
| C | 0.00000000 | 0.00000000 | 1.88438600  |
| N | 0.00000000 | 0.00000000 | 0.59564400  |
| C | 0.00000000 | 0.00000000 | -0.59264700 |
| S | 0.00000000 | 0.00000000 | -2.16245200 |

|                                              |             |
|----------------------------------------------|-------------|
| Zero-point correction=                       | 0.029099    |
| Thermal correction to Energy=                | 0.034326    |
| Thermal correction to Enthalpy=              | 0.035270    |
| Thermal correction to Gibbs Free Energy=     | 0.007225    |
| Sum of electronic and zero-point Energies=   | -567.838396 |
| Sum of electronic and thermal Energies=      | -567.833169 |
| Sum of electronic and thermal Enthalpies=    | -567.832225 |
| Sum of electronic and thermal Free Energies= | -567.860270 |

### HC≡CCNS

B3LYP/6-311++G(3df,3pd)

|   |            |            |             |
|---|------------|------------|-------------|
| C | 0.00000000 | 0.00000000 | -3.15332200 |
| H | 0.00000000 | 0.00000000 | -4.21516500 |
| C | 0.00000000 | 0.00000000 | -1.94430400 |
| S | 0.00000000 | 0.00000000 | 2.15190300  |
| C | 0.00000000 | 0.00000000 | -0.60187500 |
| N | 0.00000000 | 0.00000000 | 0.56881700  |

|                                              |             |
|----------------------------------------------|-------------|
| Zero-point correction=                       | 0.029248    |
| Thermal correction to Energy=                | 0.034576    |
| Thermal correction to Enthalpy=              | 0.035520    |
| Thermal correction to Gibbs Free Energy=     | 0.003008    |
| Sum of electronic and zero-point Energies=   | -567.806007 |
| Sum of electronic and thermal Energies=      | -567.800680 |
| Sum of electronic and thermal Enthalpies=    | -567.799735 |
| Sum of electronic and thermal Free Energies= | -567.832248 |

### syn-HC≡CCSN

B3LYP/6-311++G(3df,3pd)

|   |             |             |            |
|---|-------------|-------------|------------|
| C | -2.48168500 | 1.15016800  | 0.00000000 |
| H | -3.50512100 | 1.43257800  | 0.00000000 |
| C | -1.30138000 | 0.82743400  | 0.00000000 |
| C | 0.00000000  | 0.59007300  | 0.00000000 |
| S | 1.34661700  | -0.31788300 | 0.00000000 |
| N | 0.66537600  | -1.67892800 | 0.00000000 |

|                                              |             |
|----------------------------------------------|-------------|
| Zero-point correction=                       | 0.025261    |
| Thermal correction to Energy=                | 0.031183    |
| Thermal correction to Enthalpy=              | 0.032127    |
| Thermal correction to Gibbs Free Energy=     | -0.004700   |
| Sum of electronic and zero-point Energies=   | -567.657801 |
| Sum of electronic and thermal Energies=      | -567.651879 |
| Sum of electronic and thermal Enthalpies=    | -567.650935 |
| Sum of electronic and thermal Free Energies= | -567.687762 |

***anti*-HC≡CCSN**

B3LYP/6-311++G(3df,3pd)

|   |             |             |            |
|---|-------------|-------------|------------|
| C | 2.23495800  | 1.85296100  | 0.00000000 |
| H | 3.13334100  | 2.41882500  | 0.00000000 |
| C | 1.20790300  | 1.20265800  | 0.00000000 |
| C | 0.00000000  | 0.60694400  | 0.00000000 |
| S | -0.64752700 | -0.83134200 | 0.00000000 |
| N | -1.91858200 | -1.58467500 | 0.00000000 |

|                                              |             |
|----------------------------------------------|-------------|
| Zero-point correction=                       | 0.026101    |
| Thermal correction to Energy=                | 0.031751    |
| Thermal correction to Enthalpy=              | 0.032695    |
| Thermal correction to Gibbs Free Energy=     | -0.002307   |
| Sum of electronic and zero-point Energies=   | -567.664725 |
| Sum of electronic and thermal Energies=      | -567.659075 |
| Sum of electronic and thermal Enthalpies=    | -567.658131 |
| Sum of electronic and thermal Free Energies= | -567.693133 |

**HC≡CNSC**

B3LYP/6-311++G(3df,3pd)

|   |             |             |             |
|---|-------------|-------------|-------------|
| C | 2.68335900  | -0.25476900 | -0.00038100 |
| H | 3.69232000  | -0.58116500 | 0.00121700  |
| C | 1.53371500  | 0.13784900  | 0.00014300  |
| N | 0.36308600  | 0.71325700  | 0.00002000  |
| S | -1.01455900 | -0.25620600 | 0.00001900  |
| C | -2.55057100 | 0.06486400  | -0.00003800 |

|                                            |             |
|--------------------------------------------|-------------|
| Zero-point correction=                     | 0.024419    |
| Thermal correction to Energy=              | 0.030420    |
| Thermal correction to Enthalpy=            | 0.031364    |
| Thermal correction to Gibbs Free Energy=   | -0.004733   |
| Sum of electronic and zero-point Energies= | -567.641327 |
| Sum of electronic and thermal Energies=    | -567.635325 |

Sum of electronic and thermal Enthalpies= -567.634381  
Sum of electronic and thermal Free Energies= -567.670479

### **NCC(H)CS**

B3LYP/6-311++G(3df,3pd)

|   |             |             |            |
|---|-------------|-------------|------------|
| C | -1.03061300 | -0.18964100 | 0.00000000 |
| H | -2.03198000 | 0.22671400  | 0.00000000 |
| C | 0.00000000  | 0.63684500  | 0.00000000 |
| S | 1.18808100  | 1.61801100  | 0.00000000 |
| C | -0.88133300 | -1.59604500 | 0.00000000 |
| N | -0.78651900 | -2.74597700 | 0.00000000 |

Zero-point correction= 0.029654  
Thermal correction to Energy= 0.034536  
Thermal correction to Enthalpy= 0.035480  
Thermal correction to Gibbs Free Energy= 0.001163  
Sum of electronic and zero-point Energies= -567.857041  
Sum of electronic and thermal Energies= -567.852159  
Sum of electronic and thermal Enthalpies= -567.851215  
Sum of electronic and thermal Free Energies= -567.885531

### **CNC(H)CS**

B3LYP/6-311++G(3df,3pd)

|   |             |             |            |
|---|-------------|-------------|------------|
| C | 1.01587800  | -0.24980700 | 0.00000000 |
| H | 2.02897700  | 0.13195700  | 0.00000000 |
| C | 0.00000000  | 0.59412600  | 0.00000000 |
| S | -1.16439600 | 1.60848900  | 0.00000000 |
| N | 0.85052400  | -1.60996000 | 0.00000000 |
| C | 0.75873700  | -2.77733000 | 0.00000000 |

Zero-point correction= 0.029121  
Thermal correction to Energy= 0.034213  
Thermal correction to Enthalpy= 0.035157  
Thermal correction to Gibbs Free Energy= 0.000506  
Sum of electronic and zero-point Energies= -567.815810  
Sum of electronic and thermal Energies= -567.810718  
Sum of electronic and thermal Enthalpies= -567.809774  
Sum of electronic and thermal Free Energies= -567.844425

### **cyc-HC≡CSCN**

B3LYP/6-311++G(3df,3pd)

|   |             |             |             |
|---|-------------|-------------|-------------|
| C | -2.31030600 | -0.46707800 | 0.00075100  |
| H | -3.29019800 | -0.87676100 | 0.00750500  |
| C | -1.19721600 | -0.00788400 | -0.00976500 |
| C | 1.62145400  | -0.75697000 | -0.59380300 |
| S | 0.28835900  | 0.76013500  | -0.03233100 |
| N | 1.42755100  | -0.55625900 | 0.58952800  |

|                                              |             |
|----------------------------------------------|-------------|
| Zero-point correction=                       | 0.025901    |
| Thermal correction to Energy=                | 0.031686    |
| Thermal correction to Enthalpy=              | 0.032630    |
| Thermal correction to Gibbs Free Energy=     | -0.003111   |
| Sum of electronic and zero-point Energies=   | -567.744771 |
| Sum of electronic and thermal Energies=      | -567.738986 |
| Sum of electronic and thermal Enthalpies=    | -567.738042 |
| Sum of electronic and thermal Free Energies= | -567.773783 |

### TS1

B3LYP/6-311++G(3df,3pd)

|   |             |             |             |
|---|-------------|-------------|-------------|
| C | -2.30848800 | -0.50433900 | -0.00339700 |
| H | -3.27881300 | -0.93600800 | 0.00397800  |
| C | -1.20609100 | -0.01796600 | -0.01417500 |
| C | 1.73698300  | -0.80687300 | -0.54214600 |
| S | 0.25867200  | 0.78023300  | -0.04458900 |
| N | 1.40080600  | -0.51038000 | 0.58110900  |

|                                              |             |
|----------------------------------------------|-------------|
| Zero-point correction=                       | 0.025516    |
| Thermal correction to Energy=                | 0.030768    |
| Thermal correction to Enthalpy=              | 0.031712    |
| Thermal correction to Gibbs Free Energy=     | -0.003147   |
| Sum of electronic and zero-point Energies=   | -567.744993 |
| Sum of electronic and thermal Energies=      | -567.739741 |
| Sum of electronic and thermal Enthalpies=    | -567.738797 |
| Sum of electronic and thermal Free Energies= | -567.773656 |

### TS2

B3LYP/6-311++G(3df,3pd)

|   |             |             |             |
|---|-------------|-------------|-------------|
| C | 2.30967200  | -0.52458700 | -0.01005300 |
| H | 3.27507100  | -0.96727400 | -0.01107400 |
| C | 1.21356000  | -0.02216100 | -0.00587400 |
| C | -1.44185800 | -0.55153700 | 0.65944700  |
| S | -0.23589300 | 0.79437900  | -0.02838500 |
| N | -1.71271700 | -0.73615500 | -0.48512600 |

|                                              |                   |
|----------------------------------------------|-------------------|
| Zero-point correction=                       | 0.025491 (Hartre) |
| Thermal correction to Energy=                | 0.030833          |
| Thermal correction to Enthalpy=              | 0.031777          |
| Thermal correction to Gibbs Free Energy=     | -0.003334         |
| Sum of electronic and zero-point Energies=   | -567.738919       |
| Sum of electronic and thermal Energies=      | -567.733578       |
| Sum of electronic and thermal Enthalpies=    | -567.732634       |
| Sum of electronic and thermal Free Energies= | -567.767745       |

### TS3

B3LYP/6-311++G(3df,3pd)

|   |             |             |             |
|---|-------------|-------------|-------------|
| C | 0.56408600  | 1.82703500  | -0.00018200 |
| H | 1.31145100  | 2.58769100  | 0.00068600  |
| C | -0.03107900 | 0.71477800  | 0.00005400  |
| C | 0.85236600  | -0.49756800 | -0.00001000 |
| S | -1.35887800 | -0.38054100 | 0.00000900  |
| N | 1.73119500  | -1.25207200 | -0.00000200 |

|                                              |                   |
|----------------------------------------------|-------------------|
| Zero-point correction=                       | 0.025693 (Hartre) |
| Thermal correction to Energy=                | 0.030647          |
| Thermal correction to Enthalpy=              | 0.031592          |
| Thermal correction to Gibbs Free Energy=     | -0.002536         |
| Sum of electronic and zero-point Energies=   | -567.718132       |
| Sum of electronic and thermal Energies=      | -567.713178       |
| Sum of electronic and thermal Enthalpies=    | -567.712234       |
| Sum of electronic and thermal Free Energies= | -567.746361       |

### TS4

B3LYP/6-311++G(3df,3pd)

|   |             |             |             |
|---|-------------|-------------|-------------|
| C | 2.20479200  | -0.14929900 | 0.00002900  |
| H | 3.16357500  | -0.60533600 | 0.00014400  |
| C | 1.01898500  | 0.11386600  | -0.00007200 |
| N | -0.05504600 | 1.08510500  | -0.00017300 |
| C | -1.30148500 | 1.00361400  | -0.00001200 |
| S | -0.89450100 | -0.79996800 | 0.00008700  |

|                                            |                   |
|--------------------------------------------|-------------------|
| Zero-point correction=                     | 0.024467 (Hartre) |
| Thermal correction to Energy=              | 0.029552          |
| Thermal correction to Enthalpy=            | 0.030496          |
| Thermal correction to Gibbs Free Energy=   | -0.003658         |
| Sum of electronic and zero-point Energies= | -567.652770       |

|                                              |             |
|----------------------------------------------|-------------|
| Sum of electronic and thermal Energies=      | -567.647684 |
| Sum of electronic and thermal Enthalpies=    | -567.646740 |
| Sum of electronic and thermal Free Energies= | -567.680895 |
